# Supplementary material for: Selonsertib, a potential drug for liver failure therapy by rescuing the mitochondrial dysfunction of macrophage via ASK1–JNK–DRP1 pathway
Source: PubMed Central journal article supplement (PMC7792153; doi:10.1186/s13578-020-00525-w), 2021-01-07
Supplement: 13578_2020_525_MOESM1_ESM.pdf [file 13578_2020_525_MOESM1_ESM.pdf]

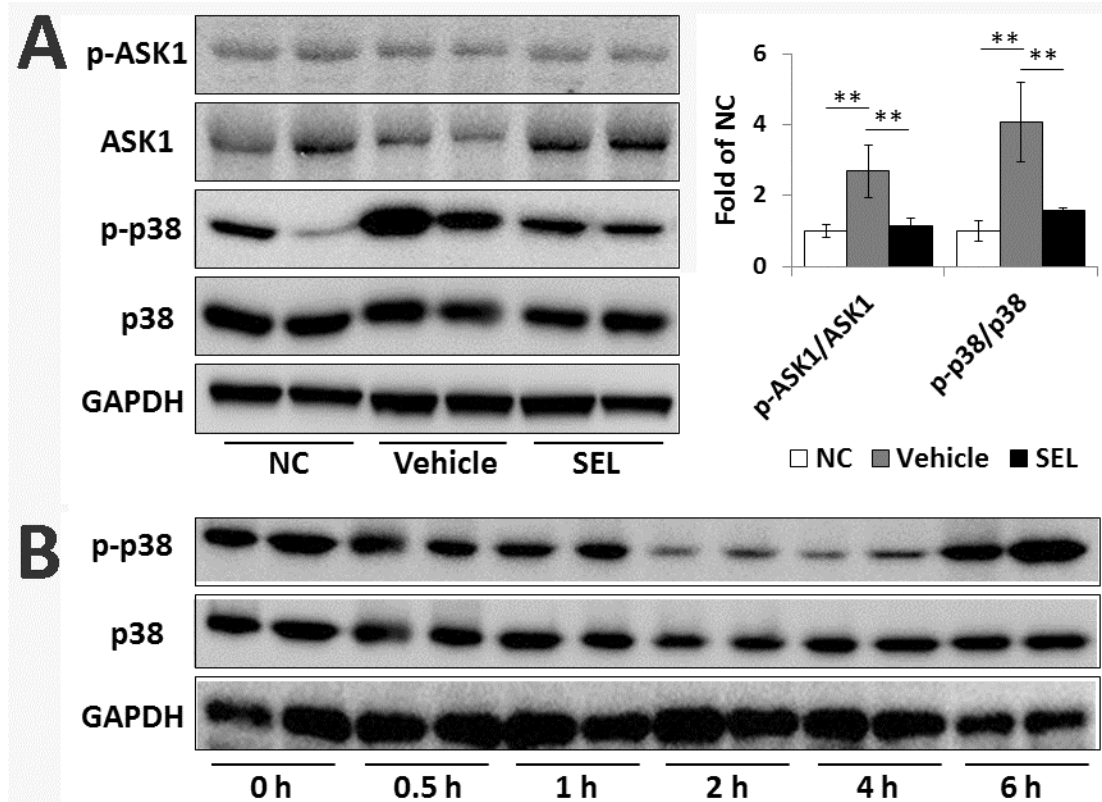

**Figure S1. Selonsertib suppresses p38 activation in LPS/GaIN-induced liver failure**

(A) Western blot analysis and gray value assay on p-ASK1, ASK1, p-p38 and p38 levels in murine liver samples. Data are presented as mean  $\pm$  SD (n=6), \*\* $P < 0.01$ ; NC, normal control; SEL, selonsertib (30 mg/kg). (B) Western blot analysis on p-p38 and p38 levels in murine liver samples at initial (0 h) and 0.5 h, 1 h, 2 h, 4 h, and 6h after LPS/GaIN injection. Two from 6 samples were shown in the blots.
